# Supplementary material for: Chemerin and Chemokine-like Receptor 1 Expression in Ovarian Cancer Associates with Proteins Involved in Estrogen Signaling
Source: MDPI journal article supplement (doi:10.3390/diagnostics13050944), 2023-03-02
Supplement: s1 [file s1]

## Supplementary figures

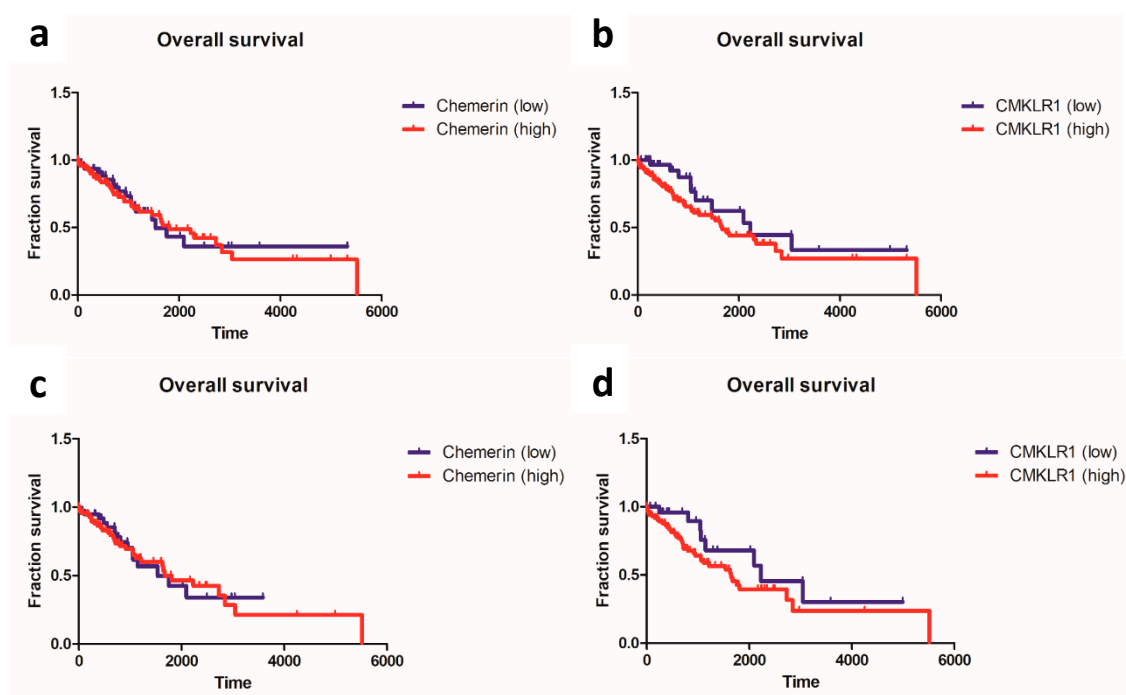

**Supplementary Figure S1.** Kaplan-Meier analyses of overall survival (OS) for chemerin (a) and CMKLR1 (b) low and high expression in all subtypes of ovarian cancer (OC) and chemerin (c) and CMKLR1 (d) low and high expression in serous OC.
